# Supplementary material
Source: publisher site journal article supplement (https://www.spandidos-publications.com/1030/downloadSupplementary)
Supplement: Supplementary file 2 [file downloadSupplementary]

## Sheet: Sheet1
Table S4. A total of 37 KEGG pathways.
ID	Description	GeneRatio	BgRatio	pvalue	p.adjust	qvalue	geneID	Count	Lnc
hsa04110	Cell cycle	19/156	124/6808	3.37954e-11	4.73135e-09	4.6602e-09	1869/5925/1031/1017/27127/991/7272/8317/995/5347/8318/2810/9133/4174/9700/898/4171/1029/1874	19	84793
hsa03030	DNA replication	7/156	36/6808	1.38429e-05	0.000969003	0.000954431	2237/5984/5427/3978/4174/4171/5422	7	84793
hsa04114	Oocyte meiosis	11/156	125/6808	0.000125786	0.00587003	0.00578176	1017/27127/991/995/5347/9133/3708/9700/815/898/6790	11	84793
hsa04115	p53 signaling pathway	8/156	72/6808	0.000219171	0.00767098	0.00755563	51512/1017/2810/9133/898/901/10572/1029	8	84793
hsa04350	TGF-beta signaling pathway	8/156	94/6808	0.00133278	0.0373179	0.0367567	2331/1634/659/2200/3397/90/285704/1874	8	84793
hsa04640	Hematopoietic cell lineage	35/289	97/6808	3.54133e-24	5.8786e-22	5.10697e-22	912/930/931/911/933/1380/915/951/3109/2322/2811/914/3575/3108/1378/3115/3574/920/916/3563/945/921/925/917/7124/913/924/3566/952/3113/910/1436/1438/3122/7066	35	284029
hsa04060	Cytokine-cytokine receptor interaction	43/289	294/6808	3.76159e-13	3.12212e-11	2.7123e-11	608/2833/4049/729230/6367/3594/2829/3587/4050/1234/959/1236/3575/8807/8742/3574/3561/50615/920/1233/3563/6363/3560/10663/7293/10563/8740/356/958/7133/7124/3458/1439/3593/3566/657/8764/8809/3604/1436/1438/2826/7066	43	284029
hsa04660	T cell receptor signaling pathway	22/289	101/6808	1.33236e-10	5.79979e-09	5.0385e-09	5777/915/84433/3702/7409/959/5293/919/3932/920/916/5588/7535/940/29851/925/917/5788/7124/3458/3937/10125	22	284029
hsa04658	Th1 and Th2 cell differentiation	21/289	92/6808	1.39754e-10	5.79979e-09	5.0385e-09	915/3109/3594/30009/3108/919/3115/3561/3932/920/916/5588/7535/3560/917/6776/3458/3593/3566/3113/3122	21	284029
hsa04514	Cell adhesion molecules (CAMs)	26/289	146/6808	3.07539e-10	1.02103e-08	8.87007e-09	933/64115/3109/6404/3683/6402/959/914/3108/3115/942/920/5792/940/29851/201633/925/958/6383/5788/3134/6403/3113/3133/923/3122	26	284029
hsa04659	Th17 cell differentiation	22/289	107/6808	4.369e-10	1.20876e-08	1.05009e-08	915/3109/3594/3662/30009/3108/919/3115/3561/50615/3932/920/916/5588/7535/3560/917/6776/3458/3566/3113/3122	22	284029
hsa04662	B cell receptor signaling pathway	17/289	71/6808	3.84564e-09	9.11966e-08	7.92259e-08	5579/974/930/695/5777/933/1380/29760/973/84433/971/5880/7409/3635/5293/2213/6850	17	284029
hsa04064	NF-kappa B signaling pathway	20/289	100/6808	4.65329e-09	9.65557e-08	8.38816e-08	5579/695/29760/4049/1540/84433/23643/4050/959/3932/5588/6363/7535/6850/8740/958/7185/7124/330/8717	20	284029
hsa04672	Intestinal immune network for IgA production	13/289	49/6808	7.36999e-08	1.35935e-06	1.18092e-06	608/3109/959/3108/3115/942/940/29851/958/3113/3122/57379/2826	13	284029
hsa04062	Chemokine signaling pathway	26/289	190/6808	9.48697e-08	1.57484e-06	1.36812e-06	5579/2833/729230/6367/2185/2829/10235/653361/3702/5880/7409/1234/1236/5293/9844/1233/6363/10663/57580/5294/10563/2793/5330/2788/7454/2826	26	284029
hsa04650	Natural killer cell mediated cytotoxicity	19/289	131/6808	2.23522e-06	3.37315e-05	2.93039e-05	5579/5777/4068/2185/3683/5880/7409/5293/919/3932/259197/7535/51744/6850/356/7124/3458/3133/3937	19	284029
hsa04612	Antigen processing and presentation	13/289	77/6808	1.7663e-05	0.000244337	0.000212265	3109/4261/3108/3115/920/925/7124/3458/3134/3113/3133/5720/3122	13	284029
hsa04940	Type I diabetes mellitus	8/289	30/6808	2.47503e-05	0.000316042	0.000274558	3109/3108/3115/3458/3134/3113/3133/3122	8	284029
hsa04630	JAK-STAT signaling pathway	18/289	162/6808	0.000160192	0.00189942	0.0016501	5777/3594/3587/3575/5293/3574/3561/50615/3563/3560/6776/3458/1439/3593/3566/1438/9063/7066	18	284029
hsa04611	Platelet activation	15/289	124/6808	0.000221846	0.00245509	0.00213283	695/64805/10235/2811/5293/5023/6916/6850/5294/5330/8605/54518/3937/10125/3708	15	284029
hsa04664	Fc epsilon RI signaling pathway	10/289	68/6808	0.000531327	0.00551251	0.00478893	695/5880/7409/3635/5293/6850/241/7124/8605/3937	10	284029
hsa04670	Leukocyte transendothelial migration	13/289	112/6808	0.000861255	0.00840991	0.00730601	399/5579/2185/3683/653361/3702/5880/7409/4689/5293/6494/1536/83593	13	284029
hsa04380	Osteoclast differentiation	14/289	128/6808	0.000998108	0.00920477	0.00799654	695/29760/1540/55423/653361/4689/5293/3932/2213/6850/7124/3458/1436/3937	14	284029
hsa04210	Apoptosis	14/289	136/6808	0.00179937	0.0157209	0.0136573	1512/5293/3563/835/356/7185/1521/7124/843/1439/330/8717/4000/3708	14	284029
hsa04621	NOD-like receptor signaling pathway	16/289	178/6808	0.00354832	0.029451	0.0255852	9051/834/114769/9447/51393/22900/114548/837/22861/5330/7124/330/1536/2634/58484/3708	16	284029
hsa04666	Fc gamma R-mediated phagocytosis	10/289	91/6808	0.00497912	0.0393587	0.0341924	5579/653361/5880/7409/3635/5293/2213/6850/5788/7454	10	284029
hsa04151	PI3K-Akt signaling pathway	10/52	354/6808	0.000283648	0.031485	0.0286634	7248/3912/1129/5295/3679/1975/2791/2885/59345/7450	10	100131067
hsa04390	Hippo signaling pathway	25/511	154/6808	0.000177435	0.0376163	0.0349267	7534/4087/7478/55233/102800317/1490/7043/8321/7040/7533/5515/8324/71/5500/10413/7532/8323/5516/84552/10297/84962/4609/27113/657/1739	25	100131208
hsa04512	ECM-receptor interaction	15/115	86/6808	8.2402e-12	9.47623e-10	8.93411e-10	22801/3693/1293/1278/7058/1291/1292/6382/3912/3910/3678/1311/7057/3672/1277	15	101929504
hsa04510	Focal adhesion	17/115	199/6808	2.94659e-08	1.69429e-06	1.59736e-06	22801/3693/1293/1278/7058/5159/1291/1292/3912/3910/10398/3678/1311/7057/3672/1277/7424	17	101929504
hsa04151	PI3K-Akt signaling pathway	17/115	354/6808	8.18477e-05	0.00313749	0.002958	22801/3693/90993/1293/1278/7058/5159/1291/1292/3912/3910/3678/1311/7057/3672/1277/7424	17	101929504
hsa04060	Cytokine-cytokine receptor interaction	52/313	294/6808	6.64391e-18	1.09624e-15	9.37141e-16	3594/10563/1234/6352/3560/3561/2833/50615/10673/3627/729230/6373/3587/1236/3601/8807/4283/3579/1439/6355/4050/1230/3458/608/7133/8809/3604/356/10663/282616/4049/3574/6356/1237/920/3575/1438/282618/8740/959/6367/958/6347/3600/7293/8743/3559/6363/2829/9466/7124/943	52	105221694
hsa04064	NF-kappa B signaling pathway	28/313	100/6808	2.71288e-15	2.23813e-13	1.91329e-13	23586/10673/695/330/5588/3932/4050/7412/6850/7535/84433/5579/4049/3383/597/23643/4615/7185/8740/959/29760/958/7128/6363/51135/7187/7124/4067	28	105221694
hsa04062	Chemokine signaling pathway	38/313	190/6808	4.61621e-15	2.53892e-13	2.17043e-13	6772/3702/10563/1234/6352/2833/3627/729230/6373/1236/5880/653361/4283/3579/6355/1230/7409/5579/10663/2793/6356/1237/2185/5293/3717/5294/6367/6347/7454/3055/6363/2829/9844/107/54331/6773/4067/2268	38	105221694
hsa04514	Cell adhesion molecules (CAMs)	32/313	146/6808	5.25356e-14	2.1671e-12	1.85257e-12	29851/6402/201633/942/914/3134/3683/941/6404/925/3108/6614/3105/10666/7412/3109/3383/920/1493/3133/940/3676/959/3113/958/3115/3684/923/3111/5792/64115/3122	32	105221694
hsa04640	Hematopoietic cell lineage	26/313	97/6808	8.79132e-14	2.90114e-12	2.48008e-12	952/914/915/925/3108/924/917/951/3109/916/921/3574/920/3575/1438/930/3676/3113/931/912/3115/3559/3684/3111/7124/3122	26	105221694
hsa04659	Th17 cell differentiation	27/313	107/6808	1.44125e-13	3.96344e-12	3.3882e-12	6772/3594/3560/3561/50615/30009/915/919/3108/5588/3932/3458/7535/3662/917/3109/916/6776/920/3717/3113/3115/3559/3111/9466/4794/3122	27	105221694
hsa04621	NOD-like receptor signaling pathway	34/313	178/6808	5.76764e-13	1.35951e-11	1.1622e-11	4939/4938/3665/4940/6772/115361/834/6352/9447/114769/330/1536/2633/9051/3428/2634/51393/837/29110/4615/2635/6347/7128/114548/199713/79792/22900/58484/51135/84674/7187/7124/6773/1535	34	105221694
hsa04658	Th1 and Th2 cell differentiation	24/313	92/6808	1.57365e-12	3.24565e-11	2.77459e-11	6772/3594/3560/3561/30009/915/919/3108/5588/3932/3458/7535/917/3109/916/6776/920/3717/3113/3115/3559/3111/4794/3122	24	105221694
hsa04650	Natural killer cell mediated cytotoxicity	28/313	131/6808	4.1744e-12	7.65307e-11	6.54233e-11	4068/3002/919/3683/5880/3937/3105/3932/7409/3458/6850/7535/5551/356/5579/4277/5777/2185/3383/5293/3133/9437/3824/7305/8743/836/7124/51744	28	105221694
hsa04660	T cell receptor signaling pathway	24/313	101/6808	1.39647e-11	2.30417e-10	1.96976e-10	29851/3702/915/919/925/3937/5588/3932/7409/3458/7535/84433/917/916/5777/5293/920/1493/940/959/10125/7124/4794/9402	24	105221694
hsa04672	Intestinal immune network for IgA production	17/313	49/6808	2.03309e-11	3.04963e-10	2.60702e-10	29851/942/10673/941/3601/3108/608/3109/940/3676/959/3113/958/3600/3115/3111/3122	17	105221694
hsa04612	Antigen processing and presentation	20/313	77/6808	1.32189e-10	1.8176e-09	1.5538e-09	3134/5721/925/3108/5720/6891/3105/3458/3109/4261/1520/920/3133/3113/3824/567/3115/3111/7124/3122	20	105221694
hsa04620	Toll-like receptor signaling pathway	21/313	104/6808	6.64612e-09	8.43546e-08	7.21118e-08	3665/6772/6352/942/3627/6373/7098/941/4283/51284/5293/23643/29110/4615/958/7096/7097/51135/51311/7187/7124	21	105221694
hsa04662	B cell receptor signaling pathway	17/313	71/6808	1.28548e-08	1.51502e-07	1.29514e-07	695/5880/7409/6850/84433/973/5579/974/3635/971/5777/5293/118788/930/29760/4794/4067	17	105221694
hsa04940	Type I diabetes mellitus	11/313	30/6808	4.06388e-08	4.47027e-07	3.82148e-07	3134/3002/3108/3105/3458/3109/3133/3113/3115/3111/3122	11	105221694
hsa04380	Osteoclast differentiation	22/313	128/6808	6.38573e-08	6.58528e-07	5.62953e-07	6772/55423/695/653361/4689/3937/3932/3458/6850/11006/5293/10288/29760/7305/54/4688/10326/8651/6688/7124/6773/1535	22	105221694
hsa04668	TNF signaling pathway	19/313	110/6808	4.78688e-07	4.64609e-06	3.97177e-06	3659/6352/843/3627/197259/330/7133/7412/8809/4049/3383/5293/7185/6347/7128/3600/836/7187/7124	19	105221694
hsa04630	JAK-STAT signaling pathway	23/313	162/6808	1.13416e-06	1.03965e-05	8.8876e-06	6772/3594/3560/3561/50615/3587/3601/1439/3458/5777/6776/282616/3574/5293/3575/1438/282618/3717/3600/8651/3559/9466/6773	23	105221694
hsa04670	Leukocyte transendothelial migration	18/313	112/6808	2.85488e-06	2.47924e-05	2.11941e-05	3702/3683/5880/653361/4689/1536/7409/7412/5579/399/2185/3383/5293/3676/83593/4688/3684/1535	18	105221694
hsa04145	Phagosome	20/313	152/6808	1.84638e-05	0.000152327	0.000130219	3134/653361/4689/3108/1536/6891/3105/3109/1520/11151/64581/3133/3113/4688/3115/3684/7097/3111/1535/3122	20	105221694
hsa04664	Fc epsilon RI signaling pathway	11/313	68/6808	0.000237775	0.00186823	0.00159709	695/5880/3937/7409/6850/3635/5293/8605/241/7124/4067	11	105221694
hsa04217	Necroptosis	18/313	162/6808	0.000428046	0.00321035	0.00274441	6772/834/7098/197259/330/1536/81030/3458/356/6776/3717/5610/7128/8605/8743/114548/7124/6773	18	105221694
hsa04622	RIG-I-like receptor signaling pathway	10/313	70/6808	0.00124259	0.00891421	0.00762044	79132/3665/9636/23586/843/3627/64135/29110/7187/7124	10	105221694
hsa04210	Apoptosis	15/313	136/6808	0.00137401	0.00944634	0.00807534	843/3002/330/1439/5551/356/1075/1521/1520/5293/597/7185/8743/836/7124	15	105221694
hsa04623	Cytosolic DNA-sensing pathway	9/313	63/6808	0.0021604	0.0142586	0.0121892	3665/834/23586/6352/9447/3627/81030/103/29110	9	105221694
hsa04666	Fc gamma R-mediated phagocytosis	11/313	91/6808	0.002865	0.0181817	0.0155429	5880/653361/7409/6850/5579/3635/5293/7454/3055/4067/274	11	105221694
hsa04933	AGE-RAGE signaling pathway in diabetic complications	11/313	100/6808	0.00594584	0.0363357	0.0310621	6772/1536/7412/5579/6776/3383/5293/3717/6347/836/7124	11	105221694
